# Supplementary material for: Conformational transitions in redissolved silk fibroin films and application for printable self-powered multistate resistive memory biomaterials
Source: Royal Society of Chemistry journal article supplement (doi:10.1039/d4ra02830a), 2024-01-01
Supplement: d4ra02830a1.pdf [file d4ra02830a1.pdf]

Electronic Supporting Information

# **Conformational Transitions in Redissolved Silk Fibroin Films and Application for Printable Self-Powered Multistate Resistive Memory Biomaterials**

Valeria Libera,<sup>a</sup> Rocco Malaspina,<sup>a</sup> Silvia Bittolo Bon,<sup>a</sup> Martina Alunni Cardinali,<sup>b</sup> Irene Chiesa,<sup>c</sup>  
Carmelo De Maria,<sup>c</sup> Alessandro Paciaroni,<sup>a</sup> Caterina Petrillo,<sup>a</sup> Lucia Comez,<sup>d</sup> Paola Sassi,<sup>b</sup> Luca  
Valentini<sup>\*a</sup>

<sup>a</sup> Dipartimento di Fisica e Geologia, Università degli Studi di Perugia, Via A. Pascoli, 06123,  
Perugia, Italy

<sup>b</sup> Department of Chemistry, Biology and Biotechnology, University of Perugia Via Elce di Sotto 8,  
06123, Perugia Italy

<sup>c</sup> Department of Ingegneria dell'Informazione and Research Center E. Piaggio, University of Pisa,  
Largo Lucio Lazzarino 1, Pisa, 56122, Italy

<sup>d</sup> CNR-IOM – Istituto Officina dei Materiali, National Research Council of  
Italy, Via Alessandro Pascoli, 06123 Perugia, Italy

<sup>e</sup> Civil and Environmental Engineering Department and INSTM Research Unit, University of  
Perugia, Strada di Pentima 8, 05100, Terni, Italy

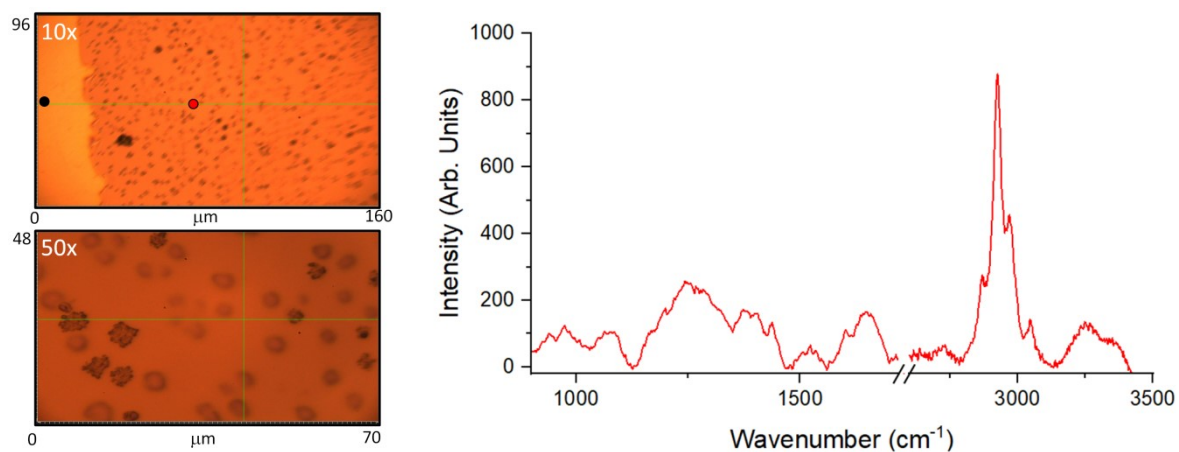

**Fig. S1.** Optical images (left) of the holey structures fabricated via extrusion-based 3D printing of SF solution in PBS on ITO after the analysis presented in Figure 5. The Raman spectrum displayed on the right was obtained from the location marked by the intersection of the green lines.

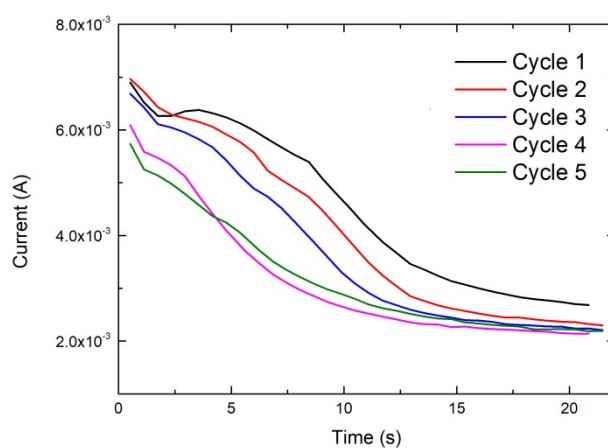

**Fig. S2.** Current fluctuation versus time recorded from cycle 1 to cycle 5 of Fig. 5b.
